# Supplementary material
Source: PubMed Central journal article supplement (PMC1852244)

# fmDC and fNK

A.

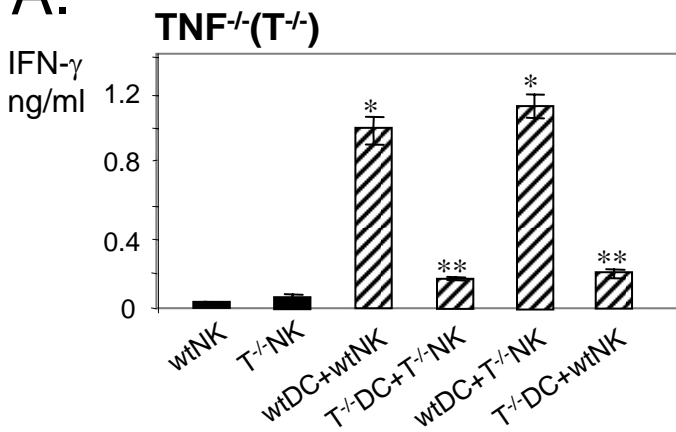

B.

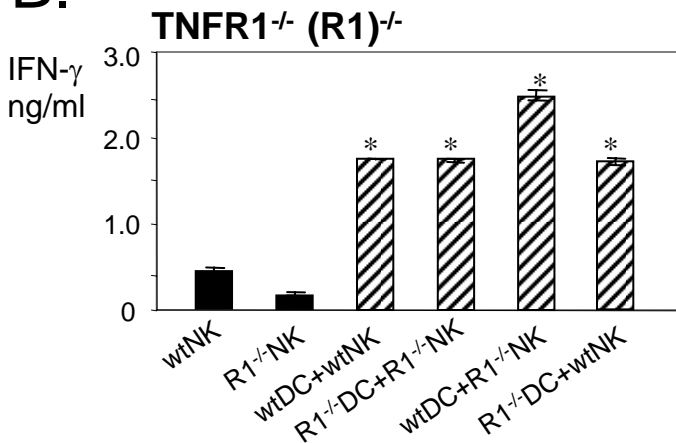

C.

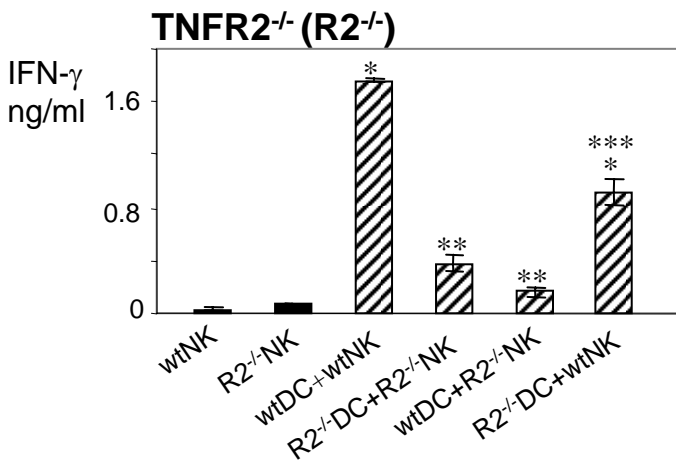

Supplement: blood_blood-2006-06-026385_1.pdf [file blood_blood-2006-06-026385_1.pdf]

# CD40

## Wild-type (wt)

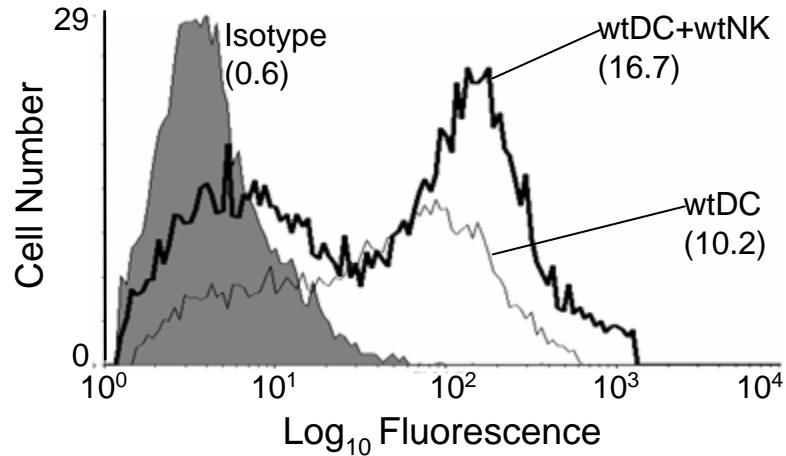

## TNF<sup>-/-</sup> (T<sup>-/-</sup>)

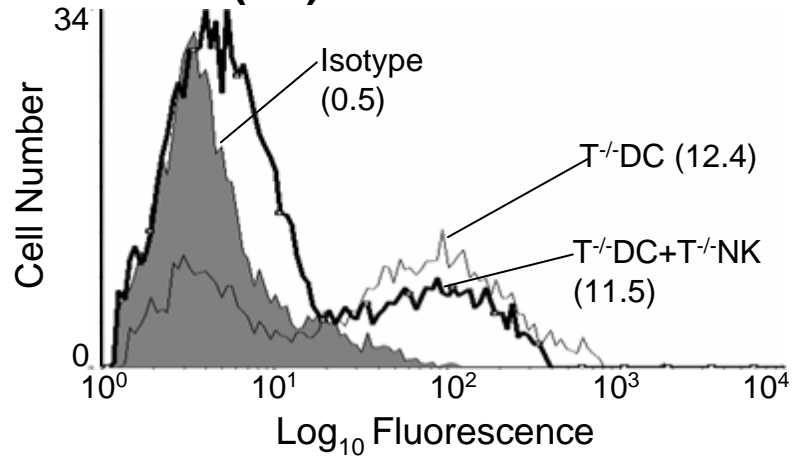

Supplement: blood_blood-2006-06-026385_2.pdf [file blood_blood-2006-06-026385_2.pdf]

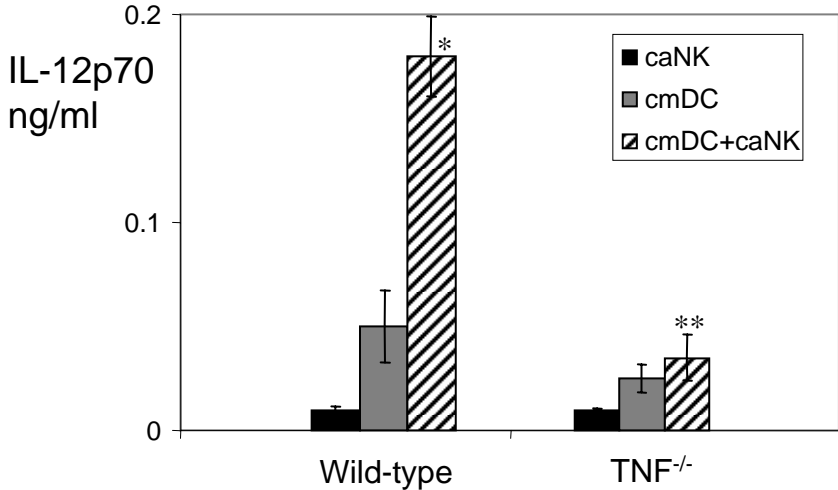

Supplement: blood_blood-2006-06-026385_3.pdf [file blood_blood-2006-06-026385_3.pdf]
